# Supplementary material
Source: Springer Nature journal article supplement (https://www.springermedizin.de/resource/supplementary/13014_2010_329_MOESM2_ESM.pdf/9633396)

Cum. Survival

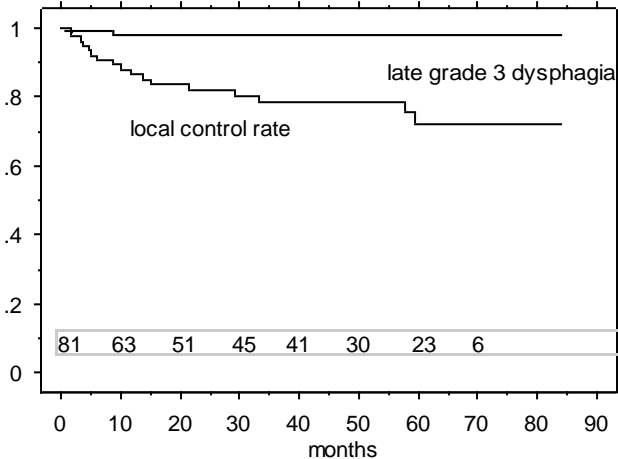

Supplement: MOESM2 [file 9633396]
